# Supplementary material
Source: PubMed Central journal article supplement (PMC3696927)
Supplement: Supp_Tables.pdf [file Supp_Tables.pdf]

## Supplementary Data

SUPPLEMENTARY TABLE S1. NITRATE, 2,4-DICHLOROPHENOL, AND PERFLUOROCTANOIC REMOVAL BY VARIOUS ADVANCED REDUCTION PROCESSES

|                               | <i>UV-L</i>   |               |                | <i>UV-N</i>   |               |                |
|-------------------------------|---------------|---------------|----------------|---------------|---------------|----------------|
|                               | <i>pH 2.2</i> | <i>pH 7.2</i> | <i>pH 11.8</i> | <i>pH 2.2</i> | <i>pH 7.2</i> | <i>pH 11.8</i> |
| Nitrate removal at 2/20 h (%) |               |               |                |               |               |                |
| Ferrous iron                  | 18.3/18.1     | 7.0/89.8      | 21.2/55.5      | 11.5/−0.8     | 2.8/4.6       | 14.3/−1.8      |
| Sulfite                       | 1.6/55.8      | 100/100       | 100/100        | 7.2/−0.8      | 6.6/3.4       | −0.7/4.4       |
| Dithionite                    | 0.3/30.9      | 50.9/91.6     | 57.0/100       | −2.2/−8.1     | −0.6/1.9      | 2.2/5.0        |
| 2,4-DCP removal at 2/20 h (%) |               |               |                |               |               |                |
| Ferrous iron                  | 14.20/35.41   | 35.21/64.59   | 71.18/79.4     | 1.7/88.6      | 25.5/44.2     | 52.0/64.7      |
| Sulfite                       |               | 76.06/94.94   | 74.77/93.9     |               | 55.5/66.05    | 69.9/73.88     |
| Dithionite                    |               | 14.49/49.13   | 10.59/44.4     |               |               |                |
| PFOA removal at 2/20 h (%)    |               |               |                |               |               |                |
| Ferrous iron                  | 4.0/4.3       | 3.4/6.3       | 2.3/5.2        | 6.5/0         | 0/0           | 0/0            |
| Sulfite                       | 2.3/3.5       | 3.1/25.4      | 2.1/40.8       | 0/0           | 0/0           | 0/0            |
| Dithionite                    | 31.1          | 34.2          | 30.5           | 31.3          | 35.9          | 34.7           |

2,4-DCP, 2,4-dichlorophenol; PFOA, perfluorooctanoic acid; UV, ultraviolet; UV-L, UV light from low-pressure bulbs; UV-N, UV light from a narrow band source.

SUPPLEMENTARY TABLE S2. NITRATE REMOVAL BY REDUCTANT/ELECTRON BEAM

| <i>Reagent</i>   | <i>pH</i> | <i>Dissolved oxygen</i> | <i>HCO<sub>3</sub><sup>-</sup> (mM)</i> | <i>Nitrate removal (%)<br/>Electron beam (10 kGy)</i> |
|------------------|-----------|-------------------------|-----------------------------------------|-------------------------------------------------------|
| None             | 3         | Saturated               | 0.005                                   | 0                                                     |
| None             | 7         | Saturated               | 0.005                                   | 14                                                    |
| None             | 11        | Saturated               | 0.005                                   | 36                                                    |
| None             | 3         | Saturated               | 0.05                                    | 0                                                     |
| None             | 7         | Saturated               | 0.05                                    | 14                                                    |
| None             | 11        | Saturated               | 0.05                                    | 63                                                    |
| None             | 3         | ≅ 0                     | 0.005                                   | 2                                                     |
| None             | 7         | ≅ 0                     | 0.005                                   | 16                                                    |
| None             | 11        | ≅ 0                     | 0.005                                   | 60                                                    |
| None             | 3         | ≅ 0                     | 0.05                                    | 0                                                     |
| None             | 7         | ≅ 0                     | 0.05                                    | 9                                                     |
| None             | 11        | ≅ 0                     | 0.05                                    | 72                                                    |
| Dithionite       | 7         | ≅ 0                     | 0.005                                   | 98                                                    |
| Sulfite          | 7         | ≅ 0                     | 0.005                                   | 100                                                   |
| Ferrous iron     | 7         | ≅ 0                     | 0.005                                   | 69                                                    |
| Ti <sup>3+</sup> | n.a.      | ≅ 0                     | 0.005                                   | 0                                                     |

SUPPLEMENTARY TABLE S3. PERCHLORATE REMOVAL  
BY VARIOUS ADVANCED REDUCTION PROCESSES

|                         | <i>UV-L (2 hr)</i> | <i>UV-L (20 hr)</i> |
|-------------------------|--------------------|---------------------|
| Perchlorate removal (%) |                    |                     |
| Sulfite                 | 3                  | 17                  |

SUPPLEMENTARY TABLE S4. 2,4-DICHLOROPHENOL  
REMOVAL BY VARIOUS ADVANCED REDUCTION PROCESSES

|                     | <i>Microwave<br/>(7 min)</i> | <i>Electron beam<br/>(10 kGy)</i> | <i>Ultrasound<br/>(2 h)</i> |
|---------------------|------------------------------|-----------------------------------|-----------------------------|
| 2,4-DCP removal (%) |                              |                                   |                             |
| Dithionite          | 9.0                          | 17                                | 87                          |
| Ferrous iron        |                              | 68                                |                             |
| Sulfite             |                              | 72                                |                             |
